# Supplementary material
Source: publisher figshare collection journal article supplement (https://aacr.figshare.com/articles/dataset/_/23627065)
Supplement: Supplementary file 1 [file 41457787]

Supplemental Figure 1.

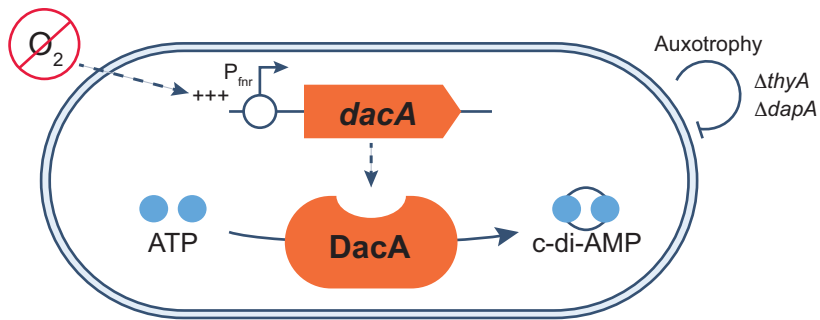

Supplemental Figure 1. Schematic depiction of SYN1891. SYN1891 is an engineered strain of *E. coli* Nissle expressing *dacA* from *L. monocytogenes* under the control of an oxygen sensitive promoter. Under low oxygen conditions, *dacA* is expressed and DacA protein in the cytosol catalyzes the conversion of ATP to c-di-AMP, a STING agonist. SYN1891 also contains deletions in *thyA* and *dapA*, which limits bacterial growth in vivo.
